# Supplementary material for: PFD-SENTINEL: Development of a screening tool for pelvic floor dysfunction in female athletes through an international Delphi consensus
Source: HighWire-hosted journal article supplement (doi:10.1136/bjsports-2022-105985), 2022-12-14
Supplement: bjsports-2022-105985supp002_data_supplement.pdf [file bjsports-2022-105985supp002_data_supplement.pdf]

**Supplementary file 2.** Preliminary research: data extracted from epidemiological studies.

From 56 records identified by the initial literature searches, 23 were excluded for different reasons (mainly wrong population and study design) and 33 articles were used to risk factors, clinical and sports-related characteristics extraction.

| ID | REFERENCE                                                                                                                                                                                                                                                                              | YEAR | ASSOCIATED RISK FACTORS (INVESTIGATED IN PRIMARY STUDIES OR REPORTED IN SECONDARY STUDIES)                                           | CLINICAL AND SPORTS-RELATED CHARACTERISTICS INVESTIGATED BY AUTHORS BUT NOT SIGNIFICANTLY ASSOCIATED WITH PFD <sup>a</sup> |
|----|----------------------------------------------------------------------------------------------------------------------------------------------------------------------------------------------------------------------------------------------------------------------------------------|------|--------------------------------------------------------------------------------------------------------------------------------------|----------------------------------------------------------------------------------------------------------------------------|
| 1  | Almeida MB, Barra AA, Saltiel F, Silva-Filho AL, Fonseca AM, Figueiredo EM. Urinary incontinence and other pelvic floor dysfunctions in female athletes in Brazil: A cross-sectional study. <i>Scand J Med Sci Sports</i> . 2016;26(9):1109-1116. doi:10.1111/sms.12546                | 2016 | High-impact sports                                                                                                                   | Constipation                                                                                                               |
| 2  | Bø K, Borgen JS. Prevalence of stress and urge urinary incontinence in elite athletes and controls. <i>Med Sci Sports Exerc</i> . 2001;33(11):1797-1802. doi:10.1097/00005768-200111000-00001                                                                                          | 2001 | Eating disorders                                                                                                                     | Irregular menstrual cycle                                                                                                  |
| 3  | Bø K, Nygaard IE. Is Physical Activity Good or Bad for the Female Pelvic Floor? A Narrative Review. <i>Sports Med</i> . 2020;50(3):471-484. doi:10.1007/s40279-019-01243-1                                                                                                             | 2020 | BMI, eating disorders, years of training, training hours/day                                                                         | Strenuous exercise, amenorrhea, weight, hormonal therapy, female athlete triad                                             |
| 4  | Carvalhais A, Natal Jorge R, Bø K. Performing high-level sport is strongly associated with urinary incontinence in elite athletes: a comparative study of 372 elite female athletes and 372 controls. <i>Br J Sports Med</i> . 2018;52(24):1586-1590. doi:10.1136/bjsports-2017-097587 | 2018 | High-level sports, family history of UI, history of urinary infection, constipation                                                  | Training hours/week, years of sports practice                                                                              |
| 5  | Casey EK, Temme K. Pelvic floor muscle function and urinary incontinence in the female athlete. <i>Phys Sportsmed</i> . 2017;45(4):399-407. doi:10.1080/00913847.2017.1372677                                                                                                          | 2017 | Decreased arch foot flexibility, high-impact sports, BMI, duration of training, frequency of training/we                             | Drinking carbonated beverages daily, smoking                                                                               |
| 6  | Cerruto MA, Balzarro M, Rubilotta E, et al. Lower urinary tract and gastrointestinal dysfunction in sportswomen: a systematic review and meta-analysis of observational studies. <i>Minerva Urol Nefrol</i> . 2020;72(6):698-711. doi:10.23736/S0393-2249.19.03582-3                   | 2020 | Competitive sport activity                                                                                                           | -                                                                                                                          |
| 7  | Da Roza T, Brandão S, Mascarenhas T, Jorge RN, Duarte JA. Volume of training and the ranking level are associated with the leakage of urine in young female trampolinists. <i>Clin J Sport Med</i> . 2015;25(3):270-275. doi:10.1097/JSM.0000000000000129                              | 2015 | Training volume (hours of training per week x years of training), training years, athletes' national ranking, higher age of menarche | -                                                                                                                          |
| 8  | de Mattos Lourenco TR, Matsuoka PK, Baracat EC, Haddad JM. Urinary incontinence in female athletes: a systematic review. <i>Int Urogynecol J</i> . 2018;29(12):1757-1763. doi:10.1007/s00192-018-3629-z                                                                                | 2018 | High-impact sports                                                                                                                   | Eating disorders, oral contraceptives, hormone replacement, parity, menopause, BMI, smoking                                |

|    |                                                                                                                                                                                                                                                                                                                             |      |                                                                                                                            |                                                                                                                                  |
|----|-----------------------------------------------------------------------------------------------------------------------------------------------------------------------------------------------------------------------------------------------------------------------------------------------------------------------------|------|----------------------------------------------------------------------------------------------------------------------------|----------------------------------------------------------------------------------------------------------------------------------|
| 9  | Dos Santos KM, Da Roza T, da Silva LL, Wolpe RE, da Silva Honório GJ, Tonon da Luz SC. Female sexual function and urinary incontinence in nulliparous athletes: An exploratory study. <i>Phys Ther Sport</i> . 2018;33:21-26. doi:10.1016/j.ptsp.2018.06.004                                                                | 2018 | High-impact sports, hours of training/day                                                                                  | Years of training, smoking, irregular menstrual cycle, oral contraceptives, age of training start                                |
| 10 | Dos Santos KM, Da Roza T, Tonon da Luz SC, Hort JP, Kruger JM, Schevchenco B. Quantification of Urinary Loss in Nulliparous Athletes During 1 Hour of Sports Training. <i>PM R</i> . 2019;11(5):495-502. doi:10.1016/j.pmrj.2018.08.383                                                                                     | 2019 | High-impact sports, years of training, age at start of training (years)                                                    | Hours of training/day, frequency of training/week, irregular menstrual cycle, smoking, BMI                                       |
| 11 | Goldstick O, Constantini N. Urinary incontinence in physically active women and female athletes. <i>Br J Sports Med</i> . 2014;48(4):296-298. doi:10.1136/bjsports-2012-091880                                                                                                                                              | 2014 | High-impact sports, eating disorders, hypermobility syndrome, decreased foot arch flexibility, oestrogen deficiency states | Excessive caffeine consumption, excessive alcohol consumption                                                                    |
| 12 | Gram MCD, Bø K. High level rhythmic gymnasts and urinary incontinence: Prevalence, risk factors, and influence on performance. <i>Scand J Med Sci Sports</i> . 2020;30(1):159-165. doi:10.1111/sms.13548                                                                                                                    | 2020 | -                                                                                                                          | Age, parity, BMI, menarche, menstrual status, eating disorders, BMI < 18.5, hours of training/week, hypermobility, athlete triad |
| 13 | Hagovska M, Švihra J, Buková A, Dračková D, Švihrová V. Prevalence and risk of sport types to stress urinary incontinence in sportswomen: A cross-sectional study. <i>Neurourol Urodyn</i> . 2018;37(6):1957-1964. doi:10.1002/nau.23538                                                                                    | 2018 | High-impact sports (volleyball>)                                                                                           | -                                                                                                                                |
| 14 | Hagovska M, Svihra J, Bukova A, Horbacz A, Svihrova V. The impact of physical activity measured by the International Physical Activity questionnaire on the prevalence of stress urinary incontinence in young women. <i>Eur J Obstet Gynecol Reprod Biol</i> . 2018;228:308-312. doi:10.1016/j.ejogrb.2018.07.011          | 2018 | High-intensity training (cumulative MET-min/week)                                                                          | -                                                                                                                                |
| 15 | Jácome C, Oliveira D, Marques A, Sá-Couto P. Prevalence and impact of urinary incontinence among female athletes. <i>Int J Gynaecol Obstet</i> . 2011;114(1):60-63. doi:10.1016/j.ijgo.2011.02.004                                                                                                                          | 2011 | Lower BMI, lower body weight                                                                                               | Years of sport, hours of training/week, smoking, parity, pelvic surgery, constipation                                            |
| 16 | Logan BL, Foster-Johnson L, Zotos E. Urinary incontinence among adolescent female athletes. <i>J Pediatr Urol</i> . 2018;14(3):241.e1-241.e9. doi:10.1016/j.jpuro.2017.12.018                                                                                                                                               | 2018 | Number of seasons with vigorous exercise                                                                                   | Hours of training/day, frequency of urination/day                                                                                |
| 17 | Nygaard IE, Thompson FL, Svengalis SL, Albright JP. Urinary incontinence in elite nulliparous athletes [published correction appears in <i>Obstet Gynecol</i> 1994 Sep;84(3):342]. <i>Obstet Gynecol</i> . 1994;84(2):183-187.                                                                                              | 1994 | Decreased arch foot flexibility                                                                                            | -                                                                                                                                |
| 18 | Nygaard IE, Glowacki C, Saltzman CL. Relationship between foot flexibility and urinary incontinence in nulliparous varsity athletes. <i>Obstet Gynecol</i> . 1996 Jun;87(6):1049-51. doi: 10.1016/0029-7844(96)00079-8. PMID: 8649689.                                                                                      | 1996 | Decreased arch foot flexibility (medial longitudinal arch height in neutral and max dorsiflexed position)                  | -                                                                                                                                |
| 19 | Parmigiano TR, Zucchi EV, Araujo MP, Guindalini CS, Castro Rde A, Di Bella ZI, Girão MJ, Cohen M, Sartori MG. Pre-participation gynecological evaluation of female athletes: a new proposal. <i>Einstein (Sao Paulo)</i> . 2014 Oct-Dec;12(4):459-66. doi: 10.1590/S1679-45082014AO3205. PMID: 25628197; PMCID: PMC4879912. | 2014 | -                                                                                                                          | -                                                                                                                                |
| 20 | Pires T, Pires P, Moreira H, Viana R. Prevalence of Urinary Incontinence in High-Impact Sport Athletes: A Systematic Review and Meta-Analysis. <i>J Hum Kinet</i> . 2020                                                                                                                                                    | 2020 | High-impact sports                                                                                                         | Physical activity that involves IAP                                                                                              |

|    |                                                                                                                                                                                                                                                                                                                                                                                            |      |                                                                                                                                                                                   |                                                                                  |
|----|--------------------------------------------------------------------------------------------------------------------------------------------------------------------------------------------------------------------------------------------------------------------------------------------------------------------------------------------------------------------------------------------|------|-----------------------------------------------------------------------------------------------------------------------------------------------------------------------------------|----------------------------------------------------------------------------------|
|    | Jul 21;73:279-288. doi: 10.2478/hukin-2020-0008. PMID: 32774559; PMCID: PMC7386138.                                                                                                                                                                                                                                                                                                        |      |                                                                                                                                                                                   |                                                                                  |
| 21 | Poświata A, Socha T, Opara J. Prevalence of stress urinary incontinence in elite female endurance athletes. <i>J Hum Kinet.</i> 2014 Dec 30;44:91-6. doi: 10.2478/hukin-2014-0114. PMID: 25713669; PMCID: PMC4327384.                                                                                                                                                                      | 2014 | High-impact sports                                                                                                                                                                | -                                                                                |
| 22 | Rebullido TR, Gómez-Tomás C, Faigenbaum AD, Chulvi-Medrano I. The Prevalence of Urinary Incontinence among Adolescent Female Athletes: A Systematic Review. <i>J Funct Morphol Kinesiol.</i> 2021 Jan 28;6(1):12. doi: 10.3390/jfmk6010012. PMID: 33525502; PMCID: PMC7931053.                                                                                                             | 2021 | Strenuous exercise, high volume and intensity of training along with low energy availability                                                                                      | -                                                                                |
| 23 | Rebullido TR, Stracciolini A. Pelvic Floor Dysfunction in Female Athletes: Is Relative Energy Deficiency in Sport a Risk Factor? <i>Curr Sports Med Rep.</i> 2019 Jul;18(7):255-257. doi: 10.1249/JSR.0000000000000615. PMID: 31283625.                                                                                                                                                    | 2019 | -                                                                                                                                                                                 | Relative energy deficiency in sport, low-energy availability, strenuous exercise |
| 24 | Schettino MT, Mainini G, Ercolano S, Vascone C, Scalzone G, D'Assisi D, Tormettino B, Gimigliano F, Esposito E, Di Donna MC, Colacurci N, Torella M. Risk of pelvic floor dysfunctions in young athletes. <i>Clin Exp Obstet Gynecol.</i> 2014;41(6):671-6. PMID: 25551961.                                                                                                                | 2014 | Heavy lifting and strenuous work                                                                                                                                                  | -                                                                                |
| 25 | Simeone C, Moroni A, Pettenò A, Antonelli A, Zani D, Orizio C, Cosciani Cunico S. Occurrence rates and predictors of lower urinary tract symptoms and incontinence in female athletes. <i>Urologia.</i> 2010 Apr-May;77(2):139-46. PMID: 20890872.                                                                                                                                         | 2010 | Age, long training hours and competition times, high-impact sports                                                                                                                | -                                                                                |
| 26 | Skaug KL, Engh ME, Frawley H, Bø K. Urinary and anal incontinence among female gymnasts and cheerleaders-bother and associated factors. A cross-sectional study. <i>Int Urogynecol J.</i> 2021 Feb 13. doi: 10.1007/s00192-021-04696-z. Epub ahead of print. PMID: 33580810.                                                                                                               | 2021 | Age (16-17 yo), training $\geq$ 4 days/week, Straining to void, Type of sport (gymnastic), Years specializing in gymnastics/cheerleading                                          | Age (>18 yo), Chronic disease, Straining to defecate                             |
| 27 | Sorriquetta-Hernández A, Padilla-Fernandez BY, Marquez-Sanchez MT, Flores-Fraile MC, Flores-Fraile J, Moreno-Pascual C, Lorenzo-Gomez A, Garcia-Cenador MB, Lorenzo-Gomez MF. Benefits of Physiotherapy on Urinary Incontinence in High-Performance Female Athletes. Meta-Analysis. <i>J Clin Med.</i> 2020 Oct 10;9(10):3240. doi: 10.3390/jcm9103240. PMID: 33050442; PMCID: PMC7601720. | 2020 | Eating disorders, constipation, family history of urinary incontinence, history of urinary tract infections, decreased flexibility of the plantar arch, high performance athletes | -                                                                                |
| 28 | Teixeira RV, Colla C, Sbruzzi G, Mallmann A, Paiva LL. Prevalence of urinary incontinence in female athletes: a systematic review with meta-analysis. <i>Int Urogynecol J.</i> 2018 Dec;29(12):1717-1725. doi: 10.1007/s00192-018-3651-1. Epub 2018 Apr 13. PMID: 29654349.                                                                                                                | 2018 | Both high-impact sports and low-impact sports                                                                                                                                     | -                                                                                |
| 29 | Thyssen HH, Clevin L, Olesen S, Lose G. Urinary incontinence in elite female athletes and dancers. <i>Int Urogynecol J Pelvic Floor Dysfunct.</i> 2002;13(1):15-7. doi: 10.1007/s001920200003. PMID: 11999199.                                                                                                                                                                             | 2002 | Jumping activity                                                                                                                                                                  | -                                                                                |
| 30 | Velázquez-Saornil J, Méndez-Sánchez E, Gómez-Sánchez S, Sánchez-Milá Z, Cortés-Llorente E, Martín-Jiménez A, Sánchez-Jiménez E, Campón-Chekroun A. Observational Study on the Prevalence of Urinary Incontinence in Female Athletes. <i>Int J Environ Res Public Health.</i> 2021 May 24;18(11):5591. doi: 10.3390/ijerph18115591. PMID: 34073782; PMCID: PMC8197179.                      | 2021 | Long-distance running, age, years of sport practice, menopause, natural childbirth and surgery                                                                                    | Presence of urinary tract infections or candidiasis, other pathologies           |

|    |                                                                                                                                                                                                                                                                                                                                  |      |                                             |                                                                                                         |
|----|----------------------------------------------------------------------------------------------------------------------------------------------------------------------------------------------------------------------------------------------------------------------------------------------------------------------------------|------|---------------------------------------------|---------------------------------------------------------------------------------------------------------|
| 31 | Vitton V, Baumstarck-Barrau K, Brardjanian S, Caballe I, Bouvier M, Grimaud JC. Impact of high-level sport practice on anal incontinence in a healthy young female population. <i>J Womens Health (Larchmt)</i> . 2011 May;20(5):757-63. doi: 10.1089/jwh.2010.2454. Epub 2011 Apr 18. PMID: 21501085.                           | 2011 | High-level sport practice (>8 h/week)       | -                                                                                                       |
| 32 | Whitney KE, Holtzman B, Cook D, Bauer S, Maffazioli GDN, Parziale AL, Ackerman KE. Low energy availability and impact sport participation as risk factors for urinary incontinence in female athletes. <i>J Pediatr Urol</i> . 2021 Jun;17(3):290.e1-290.e7. doi: 10.1016/j.jpuro.2021.01.041. Epub 2021 Jan 30. PMID: 33622629. | 2021 | Low energy availability, high impact sports | -                                                                                                       |
| 33 | Yi J, Tenfelde S, Tell D, Brincat C, Fitzgerald C. Triathlete Risk of Pelvic Floor Disorders, Pelvic Girdle Pain, and Female Athlete Triad. <i>Female Pelvic Med Reconstr Surg</i> . 2016 Sep-Oct;22(5):373-6. doi: 10.1097/SPV.0000000000000296. PMID: 27403753.                                                                | 2016 | Triathlon                                   | High-impact sports, female athlete triad: disordered eating, menstrual irregularities, and osteoporosis |

<sup>a</sup> BMI= Body Mass Index; PFD= Pelvic Floor Dysfunction
